# Supplementary material
Source: PubMed Central journal article supplement (PMC3248052)
Supplement: NIHMS287746-supplement-supplement_1.pdf [file NIHMS287746-supplement-supplement_1.pdf]

Supplementary Table 1. All metabolism SNPs sorted by position. UGT1A refers to multiple genes in the UGT1A cluster. UGT2 A1/A2 refers to the UGT2A1/UGT2A2 cluster.

| RS ID      | Chr | Position  | Gene | Case/Control Association |         |                    | CPD     | LD Bin |
|------------|-----|-----------|------|--------------------------|---------|--------------------|---------|--------|
|            |     |           |      | MAF                      | P-Value | OR (95% CI)        | P-Value |        |
| rs17355419 | 1   | 146581676 | FMO5 | 0.26                     | 0.2982  | 0.92 (0.79 - 1.08) | 0.6497  |        |
| rs894469   | 1   | 146672906 | FMO5 | 0.07                     | 0.7460  | 1.05 (0.80 - 1.37) | 0.5688  |        |
| rs1470261  | 1   | 146694922 | FMO5 | 0.36                     | 0.5884  | 0.96 (0.83 - 1.11) | 0.9437  | 1      |
| rs1470262  | 1   | 146694981 | FMO5 | 0.36                     | 0.5606  | 0.96 (0.83 - 1.11) | 0.9030  | 1      |
| rs17356024 | 1   | 146695015 | FMO5 | 0.03                     | 0.1000  | 1.45 (0.93 - 2.26) | 0.0878  | 2      |
| rs17356031 | 1   | 146696435 | FMO5 | 0.03                     | 0.0743  | 1.50 (0.96 - 2.35) | 0.0652  | 2      |
| rs11576360 | 1   | 146740576 | FMO5 | 0.13                     | 0.8320  | 0.98 (0.79 - 1.21) | 0.7649  |        |
| rs4950415  | 1   | 146822702 | FMO5 | 0.24                     | 0.2124  | 0.90 (0.77 - 1.06) | 0.5044  |        |
| rs7539416  | 1   | 146881586 | FMO5 | 0.09                     | 0.3863  | 0.90 (0.70 - 1.15) | 0.7309  |        |
| rs10910879 | 1   | 171053153 | FMO3 | 0.18                     | 0.1593  | 1.14 (0.95 - 1.38) | 0.1688  | 3      |
| rs1736554  | 1   | 171058194 | FMO3 | 0.06                     | 0.0839  | 1.30 (0.97 - 1.74) | 0.1876  | 4      |
| rs17564210 | 1   | 171058236 | FMO3 | 0.08                     | 0.6740  | 0.95 (0.73 - 1.23) | 0.1818  |        |
| rs3754487  | 1   | 171058251 | FMO3 | 0.18                     | 0.1711  | 1.14 (0.95 - 1.37) | 0.1583  | 3      |
| rs12404183 | 1   | 171058946 | FMO3 | 0.07                     | 0.8709  | 1.02 (0.77 - 1.35) | 0.9242  | 5      |
| rs1736560  | 1   | 171059150 | FMO3 | 0.30                     | 0.0307  | 1.18 (1.02 - 1.38) | 0.0668  |        |
| rs12404218 | 1   | 171059257 | FMO3 | 0.07                     | 0.9894  | 1.00 (0.76 - 1.32) | 0.7764  | 5      |
| rs3754491  | 1   | 171059623 | FMO3 | 0.07                     | 0.8473  | 1.03 (0.78 - 1.36) | 0.9947  | 5      |
| rs11578281 | 1   | 171060104 | FMO3 | 0.01                     | 0.9374  | 0.97 (0.49 - 1.94) | 0.7578  |        |
| rs1800822  | 1   | 171076935 | FMO3 | 0.06                     | 0.4693  | 1.11 (0.83 - 1.48) | 0.3983  |        |
| rs2266782  | 1   | 171076966 | FMO3 | 0.41                     | 0.2757  | 1.08 (0.94 - 1.25) | 0.7495  |        |
| rs1736557  | 1   | 171080080 | FMO3 | 0.07                     | 0.1326  | 1.23 (0.94 - 1.62) | 0.2923  | 4      |
| rs7061710  | 1   | 171080615 | FMO3 | 0.22                     | 0.4236  | 1.07 (0.90 - 1.27) | 0.6629  | 6      |
| rs909530   | 1   | 171083174 | FMO3 | 0.25                     | 0.4698  | 1.06 (0.90 - 1.25) | 0.4988  | 6      |
| rs2266780  | 1   | 171083242 | FMO3 | 0.19                     | 0.5067  | 1.06 (0.89 - 1.28) | 0.7227  | 6      |
| rs1795240  | 1   | 171091875 | FMO3 | 0.47                     | 0.1444  | 0.90 (0.79 - 1.04) | 0.4568  |        |
| rs16864096 | 1   | 171105794 | FMO3 | 0.25                     | 0.4450  | 1.07 (0.90 - 1.26) | 0.4869  | 6      |
| rs9663011  | 1   | 171112621 | FMO3 | 0.22                     | 0.6269  | 1.04 (0.88 - 1.23) | 0.8952  |        |
| rs11812044 | 1   | 171115567 | FMO3 | 0.19                     | 0.5517  | 1.06 (0.88 - 1.27) | 0.8039  | 6      |
| rs6657314  | 1   | 171155103 | FMO2 | 0.43                     | 0.6878  | 1.03 (0.89 - 1.19) | 0.6667  | 7      |
| rs11806072 | 1   | 171156997 | FMO2 | 0.42                     | 0.5235  | 1.05 (0.91 - 1.21) | 0.5561  | 7      |
| rs2020860  | 1   | 171162583 | FMO2 | 0.05                     | 0.7507  | 0.95 (0.68 - 1.31) | 0.8312  | 8      |
| rs7516877  | 1   | 171165661 | FMO2 | 0.10                     | 0.3451  | 0.90 (0.71 - 1.13) | 0.3854  | 9      |
| rs2307492  | 1   | 171168545 | FMO2 | 0.10                     | 0.3061  | 0.89 (0.70 - 1.12) | 0.3482  | 9      |
| rs10798263 | 1   | 171170209 | FMO2 | 0.32                     | 0.1325  | 1.12 (0.97 - 1.31) | 0.1588  | 10     |

|            |                   |      |        |                    |        |    |
|------------|-------------------|------|--------|--------------------|--------|----|
| rs2236874  | 1 171170244 FMO2  | 0.42 | 0.4587 | 1.06 (0.92 - 1.22) | 0.4741 | 7  |
| rs2020863  | 1 171174531 FMO2  | 0.10 | 0.5935 | 0.94 (0.74 - 1.19) | 0.6306 | 11 |
| rs2020869  | 1 171178152 FMO2  | 0.14 | 0.1385 | 0.86 (0.71 - 1.05) | 0.1746 |    |
| rs10912593 | 1 171188057 FMO2  | 0.32 | 0.2469 | 1.09 (0.94 - 1.27) | 0.2068 | 10 |
| rs2049922  | 1 171202927 FMO1  | 0.45 | 0.7306 | 1.03 (0.89 - 1.18) | 0.6972 | 7  |
| rs17350523 | 1 171217445 FMO1  | 0.39 | 0.8935 | 1.01 (0.88 - 1.17) | 0.8774 | 7  |
| rs12720462 | 1 171217691 FMO1  | 0.09 | 0.7833 | 0.97 (0.75 - 1.24) | 0.7449 | 11 |
| rs4916191  | 1 171218287 FMO1  | 0.44 | 0.9905 | 1.00 (0.87 - 1.15) | 0.7920 | 7  |
| rs4916192  | 1 171218366 FMO1  | 0.45 | 0.8602 | 1.01 (0.88 - 1.17) | 0.7785 | 7  |
| rs4480395  | 1 171218955 FMO1  | 0.38 | 0.7164 | 1.03 (0.89 - 1.18) | 0.7711 | 7  |
| rs6689616  | 1 171219803 FMO1  | 0.05 | 0.6087 | 0.92 (0.68 - 1.26) | 0.9904 | 8  |
| rs4073692  | 1 171221917 FMO1  | 0.17 | 0.9054 | 1.01 (0.84 - 1.22) | 0.9051 |    |
| rs16864245 | 1 171222380 FMO1  | 0.06 | 0.6362 | 0.93 (0.68 - 1.27) | 0.6233 | 8  |
| rs4916273  | 1 171223134 FMO1  | 0.09 | 0.2441 | 0.86 (0.66 - 1.11) | 0.5900 |    |
| rs12567338 | 1 171223747 FMO1  | 0.24 | 0.3128 | 1.09 (0.92 - 1.28) | 0.6461 |    |
| rs4433435  | 1 171223951 FMO1  | 0.40 | 0.0094 | 0.83 (0.72 - 0.95) | 0.0288 |    |
| rs10798294 | 1 171224087 FMO1  | 0.30 | 0.0875 | 0.88 (0.75 - 1.02) | 0.2279 |    |
| rs10912675 | 1 171227216 FMO1  | 0.28 | 0.0065 | 0.80 (0.68 - 0.94) | 0.0578 | 12 |
| rs10912698 | 1 171238786 FMO1  | 0.13 | 0.2037 | 0.87 (0.71 - 1.08) | 0.6052 | 13 |
| rs742350   | 1 171250044 FMO1  | 0.14 | 0.0019 | 0.72 (0.58 - 0.88) | 0.0083 | 14 |
| rs12049309 | 1 171252013 FMO1  | 0.11 | 0.3247 | 0.89 (0.71 - 1.12) | 0.4325 |    |
| rs1126692  | 1 171252287 FMO1  | 0.14 | 0.0014 | 0.71 (0.58 - 0.88) | 0.0065 | 14 |
| rs12954    | 1 171254794 FMO1  | 0.14 | 0.2123 | 0.88 (0.71 - 1.08) | 0.4601 | 13 |
| rs7877     | 1 171254890 FMO1  | 0.28 | 0.0011 | 0.77 (0.65 - 0.90) | 0.0128 | 12 |
| rs16864387 | 1 171283843 FMO4  | 0.14 | 0.0013 | 0.71 (0.58 - 0.88) | 0.0070 | 14 |
| rs3820170  | 1 171303925 FMO4  | 0.42 | 0.0786 | 0.88 (0.76 - 1.02) | 0.7064 |    |
| rs12737633 | 1 171309619 FMO4  | 0.31 | 0.2349 | 0.91 (0.79 - 1.06) | 0.9520 | 15 |
| rs1042772  | 1 171311003 FMO4  | 0.47 | 0.0938 | 0.89 (0.77 - 1.02) | 0.8090 | 16 |
| rs1018390  | 1 171336342 FMO4  | 0.46 | 0.0890 | 0.88 (0.77 - 1.02) | 0.9500 | 16 |
| rs1018392  | 1 171353864 FMO4  | 0.33 | 0.4754 | 0.95 (0.82 - 1.10) | 0.6322 | 15 |
| rs2602363  | 2 234520525 UGT1A | 0.29 | 0.3457 | 0.93 (0.80 - 1.08) | 0.2846 | 17 |
| rs13400017 | 2 234529391 UGT1A | 0.25 | 0.6885 | 0.97 (0.83 - 1.14) | 0.8323 | 18 |
| rs2741034  | 2 234548814 UGT1A | 0.29 | 0.3137 | 0.92 (0.79 - 1.08) | 0.2570 | 17 |
| rs12327959 | 2 234556326 UGT1A | 0.25 | 0.8482 | 0.98 (0.84 - 1.16) | 0.9608 | 18 |
| rs2248733  | 2 234564737 UGT1A | 0.16 | 0.3968 | 1.09 (0.90 - 1.32) | 0.9950 |    |
| rs1453322  | 2 234565438 UGT1A | 0.25 | 0.7820 | 0.98 (0.83 - 1.15) | 0.9026 | 18 |
| rs13418420 | 2 234578762 UGT1A | 0.25 | 0.5389 | 0.95 (0.81 - 1.12) | 0.5707 | 18 |
| rs10176426 | 2 234579915 UGT1A | 0.11 | 0.4212 | 0.91 (0.73 - 1.14) | 0.4679 |    |
| rs2741045  | 2 234580140 UGT1A | 0.29 | 0.2891 | 0.92 (0.79 - 1.07) | 0.3026 | 19 |
| rs6714486  | 2 234580305 UGT1A | 0.06 | 0.1973 | 1.23 (0.90 - 1.67) | 0.2443 | 20 |
| rs4663871  | 2 234581587 UGT1A | 0.22 | 0.2289 | 1.11 (0.94 - 1.32) | 0.8251 | 21 |
| rs2602377  | 2 234582212 UGT1A | 0.38 | 0.4441 | 0.94 (0.82 - 1.09) | 0.7536 | 22 |

|            |   |           |         |      |        |      |               |        |    |
|------------|---|-----------|---------|------|--------|------|---------------|--------|----|
| rs12053462 | 2 | 234587639 | UGT1A   | 0.22 | 0.2488 | 1.11 | (0.93 - 1.31) | 0.8607 | 21 |
| rs6736743  | 2 | 234595950 | UGT1A   | 0.40 | 0.7933 | 0.98 | (0.85 - 1.13) | 0.6077 | 23 |
| rs4485562  | 2 | 234597566 | UGT1A   | 0.22 | 0.1664 | 1.13 | (0.95 - 1.34) | 0.7524 | 21 |
| rs6707947  | 2 | 234597915 | UGT1A   | 0.38 | 0.4886 | 0.95 | (0.82 - 1.10) | 0.7839 | 22 |
| rs6759892  | 2 | 234601669 | UGT1A   | 0.40 | 0.7748 | 0.98 | (0.85 - 1.13) | 0.6474 | 23 |
| rs1105880  | 2 | 234601965 | UGT1A   | 0.34 | 0.3189 | 0.93 | (0.80 - 1.07) | 0.2730 | 19 |
| rs2070959  | 2 | 234602191 | UGT1A   | 0.32 | 0.2263 | 0.91 | (0.78 - 1.06) | 0.1938 | 19 |
| rs1105879  | 2 | 234602202 | UGT1A   | 0.34 | 0.2398 | 0.92 | (0.79 - 1.06) | 0.1908 | 19 |
| rs7592624  | 2 | 234602906 | UGT1A   | 0.44 | 0.9210 | 0.99 | (0.86 - 1.15) | 0.4107 |    |
| rs6751673  | 2 | 234604903 | UGT1A   | 0.31 | 0.0791 | 1.14 | (0.98 - 1.33) | 0.4214 |    |
| rs7572563  | 2 | 234617236 | UGT1A   | 0.47 | 0.9158 | 1.01 | (0.88 - 1.16) | 0.4836 | 24 |
| rs4233633  | 2 | 234619937 | UGT1A   | 0.12 | 0.7724 | 1.03 | (0.84 - 1.27) | 0.4743 |    |
| rs17862867 | 2 | 234622310 | UGT1A   | 0.09 | 0.7042 | 1.05 | (0.82 - 1.34) | 0.8207 | 25 |
| rs4663945  | 2 | 234623117 | UGT1A   | 0.08 | 0.5169 | 1.08 | (0.85 - 1.38) | 0.6769 | 25 |
| rs1875263  | 2 | 234625622 | UGT1A   | 0.36 | 0.8554 | 1.01 | (0.87 - 1.18) | 0.5399 | 23 |
| rs869283   | 2 | 234626287 | UGT1A   | 0.38 | 0.7036 | 0.97 | (0.84 - 1.12) | 0.3784 | 23 |
| rs3732218  | 2 | 234627304 | UGT1A   | 0.08 | 0.8408 | 1.03 | (0.80 - 1.31) | 0.9828 | 25 |
| rs6755571  | 2 | 234627536 | UGT1A   | 0.06 | 0.1313 | 1.27 | (0.93 - 1.75) | 0.1925 | 20 |
| rs2011404  | 2 | 234627937 | UGT1A   | 0.18 | 0.9543 | 0.99 | (0.83 - 1.20) | 0.1720 |    |
| rs871514   | 2 | 234628529 | UGT1A   | 0.44 | 0.5066 | 0.95 | (0.83 - 1.10) | 0.1744 | 24 |
| rs904855   | 2 | 234628576 | UGT1A   | 0.05 | 0.6230 | 1.08 | (0.80 - 1.47) | 0.9746 | 26 |
| rs904856   | 2 | 234628647 | UGT1A   | 0.05 | 0.9305 | 1.01 | (0.73 - 1.41) | 0.7540 | 26 |
| rs6715325  | 2 | 234635241 | UGT1A   | 0.41 | 0.8130 | 0.98 | (0.85 - 1.13) | 0.2711 | 24 |
| rs4663969  | 2 | 234655313 | UGT1A   | 0.41 | 0.8300 | 0.98 | (0.85 - 1.14) | 0.2306 | 24 |
| rs7556676  | 2 | 234658250 | UGT1A   | 0.41 | 0.9206 | 0.99 | (0.86 - 1.15) | 0.2736 | 24 |
| rs2221198  | 2 | 234658623 | UGT1A   | 0.41 | 0.8009 | 0.98 | (0.85 - 1.13) | 0.2044 | 24 |
| rs2003569  | 2 | 234667937 | UGT1A   | 0.11 | 0.0643 | 1.23 | (0.99 - 1.54) | 0.1415 |    |
| rs887829   | 2 | 234668570 | UGT1A   | 0.32 | 0.0764 | 0.87 | (0.75 - 1.01) | 0.0198 |    |
| rs2302538  | 2 | 234676413 | UGT1A   | 0.13 | 0.1868 | 1.16 | (0.93 - 1.44) | 0.2207 |    |
| rs4148328  | 2 | 234677659 | UGT1A   | 0.37 | 0.6943 | 1.03 | (0.89 - 1.19) | 0.6956 |    |
| rs11563251 | 2 | 234679384 | UGT1A   | 0.11 | 0.2412 | 1.15 | (0.91 - 1.44) | 0.4628 |    |
| rs1042640  | 2 | 234681544 | UGT1A   | 0.20 | 0.3268 | 0.92 | (0.77 - 1.09) | 0.6905 | 27 |
| rs8330     | 2 | 234681645 | UGT1A   | 0.23 | 0.6094 | 0.96 | (0.81 - 1.13) | 0.8475 | 27 |
| rs1319289  | 4 | 69631668  | UGT2B10 | 0.13 | 0.7655 | 0.97 | (0.79 - 1.19) | 0.8821 | 28 |
| rs12645539 | 4 | 69640718  | UGT2B10 | 0.23 | 0.1920 | 0.90 | (0.76 - 1.06) | 0.2536 |    |
| rs11726322 | 4 | 69691521  | UGT2B10 | 0.12 | 0.0977 | 0.83 | (0.67 - 1.03) | 0.1287 | 29 |
| rs4694358  | 4 | 69696648  | UGT2B10 | 0.12 | 0.7501 | 0.97 | (0.79 - 1.19) | 0.8530 | 28 |
| rs11737566 | 4 | 69701067  | UGT2B10 | 0.12 | 0.0977 | 0.83 | (0.67 - 1.03) | 0.1287 | 29 |
| rs6843220  | 4 | 69706273  | UGT2B10 | 0.12 | 0.0977 | 0.83 | (0.67 - 1.03) | 0.1287 | 29 |
| rs6836520  | 4 | 69710615  | UGT2B10 | 0.09 | 0.1696 | 0.84 | (0.66 - 1.08) | 0.1555 | 30 |
| rs1841046  | 4 | 69717920  | UGT2B10 | 0.13 | 0.7233 | 0.96 | (0.79 - 1.18) | 0.8345 | 28 |
| rs6600855  | 4 | 69725006  | UGT2B10 | 0.09 | 0.1939 | 0.85 | (0.66 - 1.09) | 0.2356 | 30 |

|            |   |          |            |      |        |      |               |        |    |
|------------|---|----------|------------|------|--------|------|---------------|--------|----|
| rs7665996  | 4 | 69731469 | UGT2B10    | 0.09 | 0.1939 | 0.85 | (0.66 - 1.09) | 0.2356 | 30 |
| rs11726946 | 4 | 69737036 | UGT2B10    | 0.12 | 0.1281 | 0.84 | (0.68 - 1.05) | 0.2112 | 29 |
| rs17146967 | 4 | 69756897 | UGT2B10    | 0.12 | 0.6821 | 0.96 | (0.78 - 1.18) | 0.8239 | 28 |
| rs6851328  | 4 | 69763587 | UGT2B10    | 0.12 | 0.1178 | 0.84 | (0.67 - 1.05) | 0.1978 | 29 |
| rs6827243  | 4 | 69763910 | UGT2B10    | 0.12 | 0.1178 | 0.84 | (0.67 - 1.05) | 0.1978 | 29 |
| rs7682207  | 4 | 69771283 | UGT2A3     | 0.13 | 0.0432 | 0.80 | (0.64 - 0.99) | 0.1146 | 29 |
| rs12651295 | 4 | 69771935 | UGT2A3     | 0.13 | 0.0390 | 0.80 | (0.64 - 0.99) | 0.0981 | 29 |
| rs6847539  | 4 | 69772694 | UGT2A3     | 0.14 | 0.4260 | 0.92 | (0.76 - 1.13) | 0.5062 | 28 |
| rs13128843 | 4 | 69789855 | UGT2A3     | 0.15 | 0.2425 | 0.89 | (0.74 - 1.08) | 0.4617 | 28 |
| rs17147016 | 4 | 69795226 | UGT2A3     | 0.19 | 0.8401 | 0.98 | (0.82 - 1.17) | 0.9398 |    |
| rs1458246  | 4 | 69818082 | UGT2A3     | 0.15 | 0.2748 | 0.90 | (0.74 - 1.09) | 0.4902 | 28 |
| rs11931604 | 4 | 69928547 | UGT2B7     | 0.14 | 0.6140 | 0.95 | (0.78 - 1.16) | 0.7589 | 28 |
| rs12506592 | 4 | 69956736 | UGT2B7     | 0.14 | 0.7102 | 0.96 | (0.79 - 1.17) | 0.7848 | 28 |
| rs4554144  | 4 | 69960555 | UGT2B7     | 0.48 | 0.7696 | 1.02 | (0.89 - 1.17) | 0.7615 | 31 |
| rs11940316 | 4 | 69961127 | UGT2B7     | 0.46 | 0.5910 | 1.04 | (0.90 - 1.20) | 0.5595 | 31 |
| rs7438135  | 4 | 69961339 | UGT2B7     | 0.46 | 0.5920 | 1.04 | (0.90 - 1.20) | 0.5563 | 31 |
| rs7662029  | 4 | 69961912 | UGT2B7     | 0.46 | 0.5917 | 1.04 | (0.90 - 1.20) | 0.5562 | 31 |
| rs1131878  | 4 | 70345904 | UGT2B4     | 0.31 | 0.7241 | 1.03 | (0.88 - 1.20) | 0.8083 |    |
| rs10518061 | 4 | 70359160 | UGT2B4     | 0.25 | 0.0897 | 1.15 | (0.98 - 1.36) | 0.4855 |    |
| rs2642872  | 4 | 70367212 | UGT2B4     | 0.19 | 0.8970 | 0.99 | (0.82 - 1.18) | 0.7746 | 32 |
| rs11732823 | 4 | 70403615 | UGT2B4     | 0.19 | 0.8820 | 0.99 | (0.82 - 1.18) | 0.7940 | 32 |
| rs17672601 | 4 | 70407499 | UGT2B4     | 0.19 | 0.8387 | 0.98 | (0.82 - 1.18) | 0.8336 | 32 |
| rs17147416 | 4 | 70438392 | UGT2 A1/A2 | 0.18 | 0.6057 | 0.95 | (0.79 - 1.15) | 0.9408 | 33 |
| rs13145826 | 4 | 70443405 | UGT2 A1/A2 | 0.20 | 0.0759 | 0.85 | (0.71 - 1.02) | 0.2880 | 34 |
| rs10004047 | 4 | 70445500 | UGT2 A1/A2 | 0.40 | 0.5224 | 1.05 | (0.91 - 1.21) | 0.2881 | 35 |
| rs6843815  | 4 | 70448870 | UGT2 A1/A2 | 0.22 | 0.3220 | 1.09 | (0.92 - 1.28) | 0.3616 | 36 |
| rs1432317  | 4 | 70450981 | UGT2 A1/A2 | 0.40 | 0.5485 | 1.05 | (0.90 - 1.21) | 0.3286 | 35 |
| rs2288741  | 4 | 70455478 | UGT2 A1/A2 | 0.22 | 0.3483 | 1.08 | (0.92 - 1.28) | 0.3821 | 36 |
| rs2288740  | 4 | 70455579 | UGT2 A1/A2 | 0.40 | 0.2482 | 1.09 | (0.94 - 1.26) | 0.9251 | 37 |
| rs1432324  | 4 | 70458182 | UGT2 A1/A2 | 0.40 | 0.3434 | 1.07 | (0.93 - 1.24) | 0.9352 | 37 |
| rs4148304  | 4 | 70460328 | UGT2 A1/A2 | 0.18 | 0.6994 | 0.96 | (0.80 - 1.16) | 0.8908 | 33 |
| rs4148301  | 4 | 70462042 | UGT2 A1/A2 | 0.09 | 0.6537 | 0.94 | (0.74 - 1.21) | 0.6774 |    |
| rs1319811  | 4 | 70462893 | UGT2 A1/A2 | 0.40 | 0.6243 | 1.04 | (0.90 - 1.20) | 0.3501 | 35 |
| rs1432314  | 4 | 70463663 | UGT2 A1/A2 | 0.15 | 0.6486 | 1.05 | (0.86 - 1.27) | 0.3239 |    |
| rs3775783  | 4 | 70463854 | UGT2 A1/A2 | 0.20 | 0.0362 | 0.82 | (0.69 - 0.99) | 0.1889 | 34 |
| rs17617467 | 4 | 70463872 | UGT2 A1/A2 | 0.25 | 0.3276 | 1.09 | (0.92 - 1.28) | 0.556  |    |
| rs4401516  | 4 | 70476723 | UGT2 A1/A2 | 0.38 | 0.0552 | 0.86 | (0.74 - 1.00) | 0.3663 |    |
| rs7670819  | 4 | 70481880 | UGT2 A1/A2 | 0.44 | 0.2724 | 1.08 | (0.94 - 1.25) | 0.3546 |    |
| rs11249452 | 4 | 70488360 | UGT2 A1/A2 | 0.34 | 0.2239 | 0.91 | (0.78 - 1.06) | 0.1578 | 38 |
| rs11249453 | 4 | 70488786 | UGT2 A1/A2 | 0.30 | 0.4251 | 0.94 | (0.80 - 1.10) | 0.2311 | 38 |
| rs10903210 | 4 | 70488849 | UGT2 A1/A2 | 0.34 | 0.2239 | 0.91 | (0.78 - 1.06) | 0.1578 | 38 |
| rs10001991 | 4 | 70491970 | UGT2 A1/A2 | 0.34 | 0.2239 | 0.91 | (0.78 - 1.06) | 0.1578 | 38 |

|            |    |           |            |      |        |      |               |        |    |
|------------|----|-----------|------------|------|--------|------|---------------|--------|----|
| rs6854350  | 4  | 70494901  | UGT2 A1/A2 | 0.30 | 0.3778 | 0.93 | (0.80 - 1.09) | 0.2041 | 38 |
| rs17618178 | 4  | 70495961  | UGT2 A1/A2 | 0.26 | 0.9753 | 1.00 | (0.85 - 1.18) | 0.4753 | 39 |
| rs7665571  | 4  | 70497601  | UGT2 A1/A2 | 0.26 | 0.8780 | 1.01 | (0.86 - 1.19) | 0.5169 | 39 |
| rs11249454 | 4  | 70499234  | UGT2 A1/A2 | 0.13 | 0.7536 | 0.97 | (0.78 - 1.20) | 0.8112 |    |
| rs11931365 | 4  | 70500527  | UGT2 A1/A2 | 0.26 | 0.8628 | 1.01 | (0.86 - 1.20) | 0.5332 | 39 |
| rs6842466  | 4  | 70500986  | UGT2 A1/A2 | 0.26 | 0.8634 | 1.01 | (0.86 - 1.20) | 0.4794 | 39 |
| rs7662915  | 4  | 70502282  | UGT2 A1/A2 | 0.26 | 0.8400 | 1.02 | (0.86 - 1.20) | 0.5451 | 39 |
| rs10518063 | 4  | 70503978  | UGT2 A1/A2 | 0.25 | 0.8021 | 1.02 | (0.87 - 1.20) | 0.5782 | 39 |
| rs9992698  | 4  | 70504313  | UGT2 A1/A2 | 0.37 | 0.9630 | 1.00 | (0.87 - 1.16) | 0.3949 | 40 |
| rs988671   | 4  | 70506828  | UGT2A1     | 0.26 | 0.7690 | 1.02 | (0.87 - 1.21) | 0.5574 | 39 |
| rs1432329  | 4  | 70513710  | UGT2A1     | 0.27 | 0.8596 | 1.01 | (0.87 - 1.19) | 0.9427 |    |
| rs4148277  | 4  | 70514829  | UGT2A1     | 0.37 | 0.6932 | 0.97 | (0.84 - 1.13) | 0.7231 | 40 |
| rs4148276  | 4  | 70514903  | UGT2A1     | 0.25 | 0.4937 | 1.06 | (0.90 - 1.25) | 0.9578 | 39 |
| rs7668703  | 4  | 70517952  | UGT2A1     | 0.46 | 0.7286 | 1.03 | (0.89 - 1.18) | 0.3790 |    |
| rs4280808  | 4  | 70519460  | UGT2A1     | 0.23 | 0.4249 | 0.93 | (0.79 - 1.10) | 0.4357 |    |
| rs10518065 | 4  | 70520597  | UGT2A1     | 0.17 | 0.6352 | 1.05 | (0.87 - 1.26) | 0.4493 |    |
| rs11249456 | 4  | 70540563  | UGT2A1     | 0.46 | 0.4938 | 0.95 | (0.82 - 1.10) | 0.8690 |    |
| rs10516603 | 4  | 115467459 | UGT8       | 0.13 | 0.4016 | 1.10 | (0.88 - 1.37) | 0.1192 |    |
| rs28399435 | 19 | 41356246  | CYP2A6     | 0.04 | 0.9855 | 1.00 | (0.70 - 1.43) | 0.4711 |    |
| rs1137115  | 19 | 41356281  | CYP2A6     | 0.25 | 0.8328 | 1.02 | (0.87 - 1.19) | 0.4687 |    |
| rs4062238  | 19 | 41451576  | CYP2B6     | 0.36 | 0.6985 | 1.03 | (0.89 - 1.20) | 0.8945 | 41 |
| rs3889806  | 19 | 41459241  | CYP2B6     | 0.36 | 0.6902 | 1.03 | (0.89 - 1.20) | 0.9286 | 41 |
| rs8109525  | 19 | 41491918  | CYP2B6     | 0.33 | 0.0954 | 0.88 | (0.75 - 1.02) | 0.1027 | 42 |
| rs3760657  | 19 | 41495433  | CYP2B6     | 0.09 | 0.1612 | 1.19 | (0.93 - 1.52) | 0.3816 | 43 |
| rs4802100  | 19 | 41496025  | CYP2B6     | 0.09 | 0.1711 | 1.19 | (0.93 - 1.51) | 0.4200 | 43 |
| rs2099361  | 19 | 41498348  | CYP2B6     | 0.36 | 0.5864 | 1.04 | (0.90 - 1.21) | 0.9101 | 41 |
| rs16974790 | 19 | 41498946  | CYP2B6     | 0.01 | 0.2264 | 1.46 | (0.79 - 2.70) | 0.4655 |    |
| rs8100458  | 19 | 41500213  | CYP2B6     | 0.33 | 0.0945 | 0.88 | (0.75 - 1.02) | 0.1016 | 42 |
| rs3745274  | 19 | 41512841  | CYP2B6     | 0.24 | 0.7326 | 1.03 | (0.87 - 1.21) | 0.2952 | 44 |
| rs8192719  | 19 | 41518773  | CYP2B6     | 0.24 | 0.7244 | 1.03 | (0.87 - 1.21) | 0.2545 | 44 |
| rs3786552  | 19 | 41521757  | CYP2B6     | 0.30 | 0.0797 | 0.87 | (0.75 - 1.02) | 0.1446 | 42 |
| rs1042389  | 19 | 41524153  | CYP2B6     | 0.21 | 0.2303 | 0.90 | (0.75 - 1.07) | 0.7188 |    |
| rs7257703  | 19 | 41536622  | CYP2B6     | 0.36 | 0.3545 | 1.07 | (0.92 - 1.24) | 0.8028 | 45 |
| rs10404959 | 19 | 41537538  | CYP2B6     | 0.36 | 0.3646 | 1.07 | (0.92 - 1.24) | 0.7636 | 45 |

CPD = Cigarettes per day
